# Supplementary material for: Meningeal lymphatic CGRP signaling governs pain via cerebrospinal fluid efflux and neuroinflammation in migraine models
Source: JCI journal article supplement (doi:10.1172/jci175616), 2024-05-14
Supplement: sd2 [file 2]

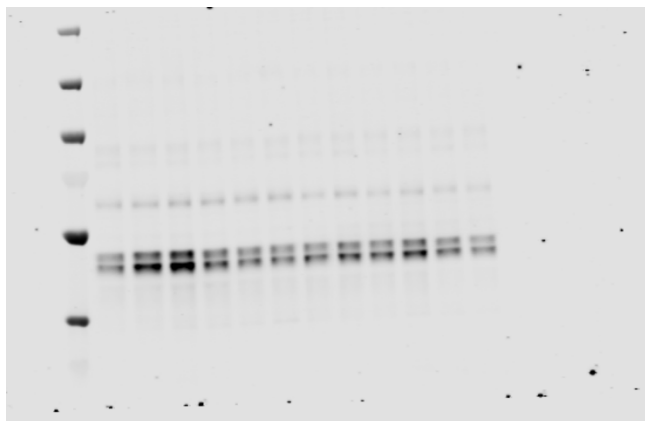

Full Unedited Gel for Figure 6

Phospho ERK; Replicate 1

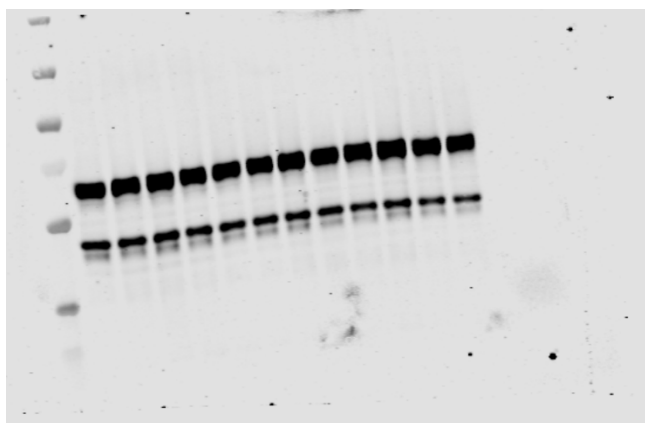

Full Unedited Gel for Figure 6

Total ERK; Replicate 1

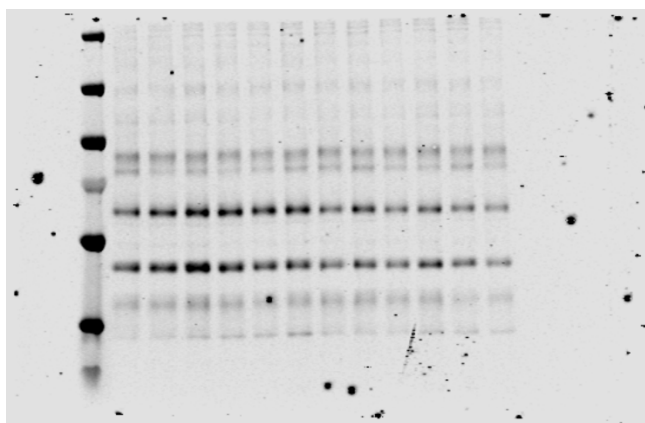

Full Unedited Gel for Figure 6

Phospho AKT; Replicate 1

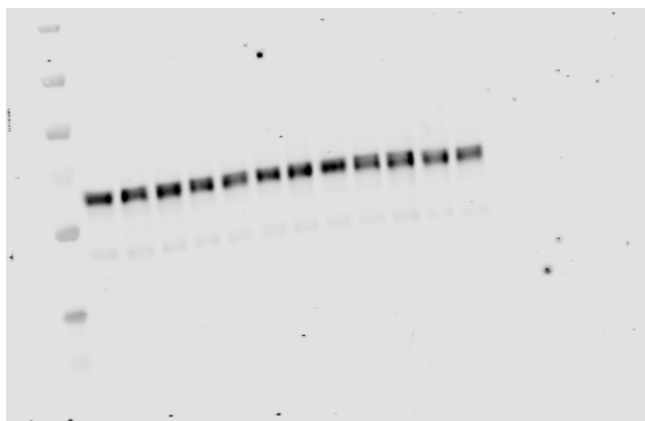

Full Unedited Gel for Figure 6

Total AKT; Replicate 1

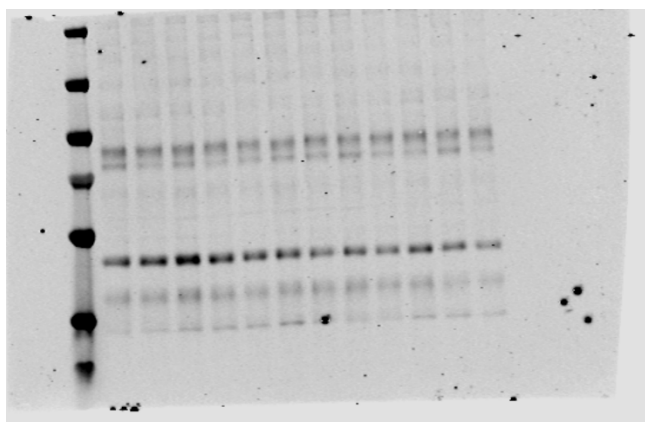

Full Unedited Gel for Figure 6

Phospho CREB; Replicate 1

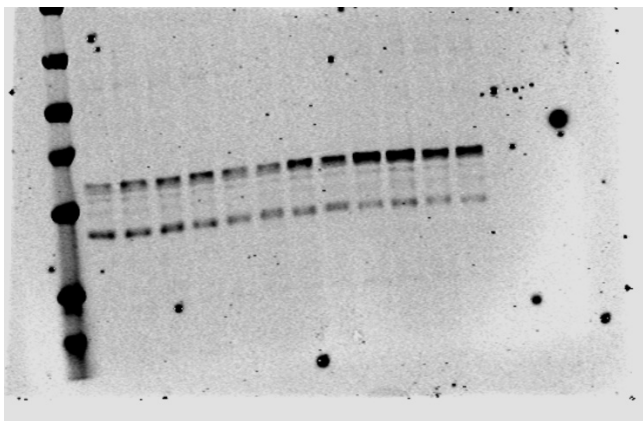

Full Unedited Gel for Figure 6

Total CREB; Replicate 1

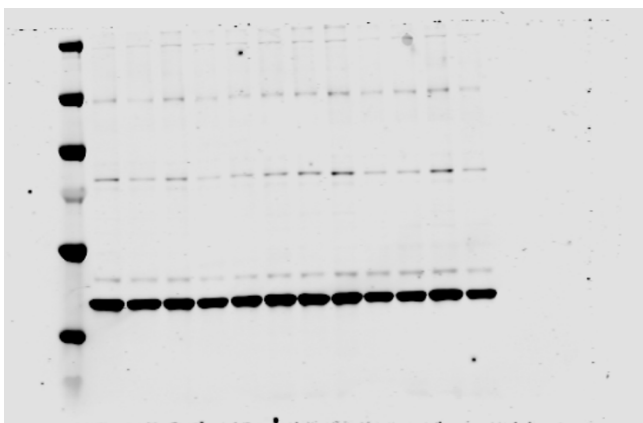

Full Unedited Gel for Figure 6

GAPDH\_Phospho Blot; Replicate 1

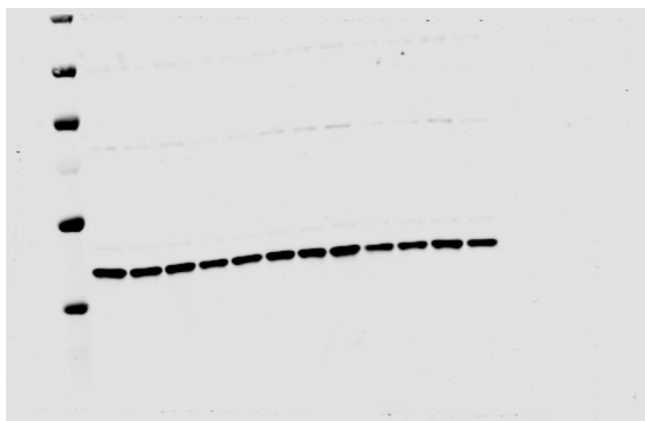

Full Unedited Gel for Figure 6

GAPDH\_Total Blot; Replicate 1

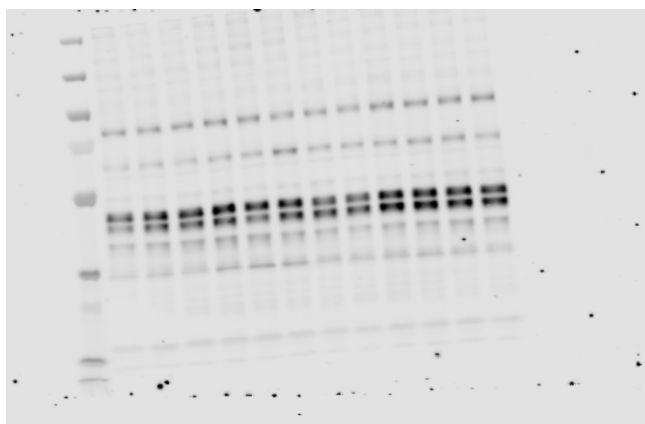

Full Unedited Gel for Figure 6

Phospho ERK; Replicate 2

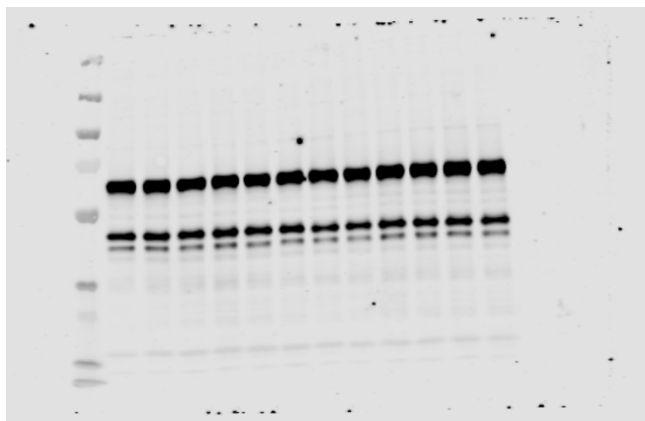

Full Unedited Gel for Figure 6

Total ERK; Replicate 2

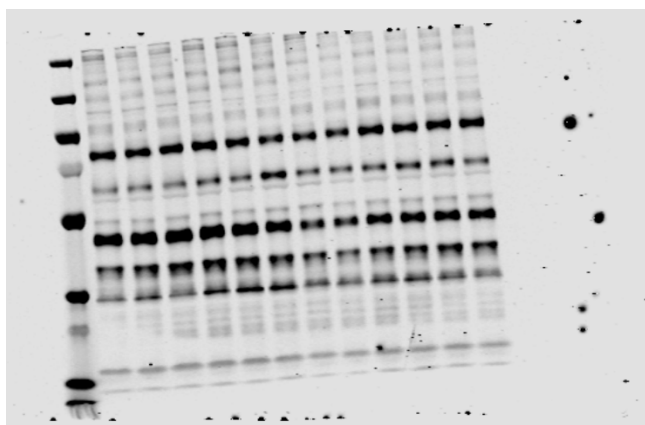

Full Unedited Gel for Figure 6

Phospho AKT; Replicate 2

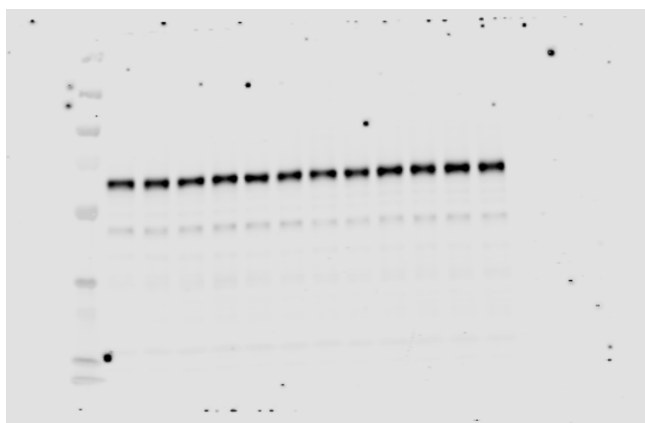

Full Unedited Gel for Figure 6

Total AKT; Replicate 2

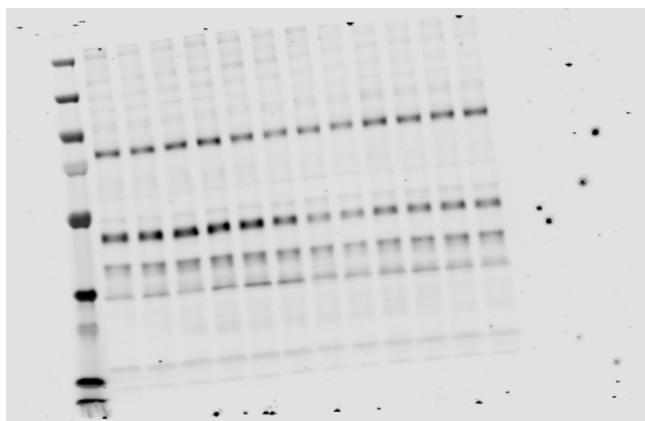

Full Unedited Gel for Figure 6

Phospho CREB; Replicate 2

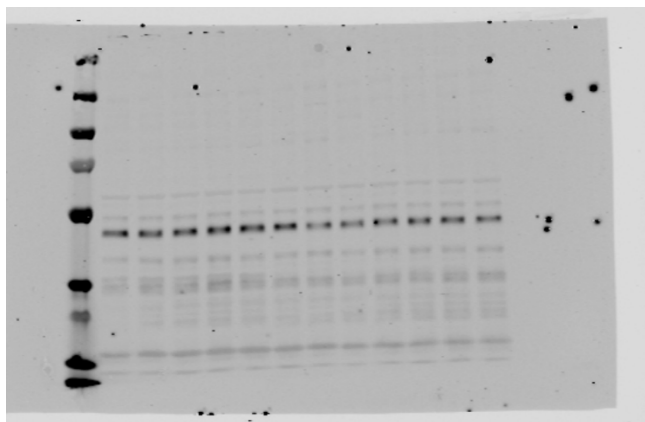

Full Unedited Gel for Figure 6

Total CREB; Replicate 2

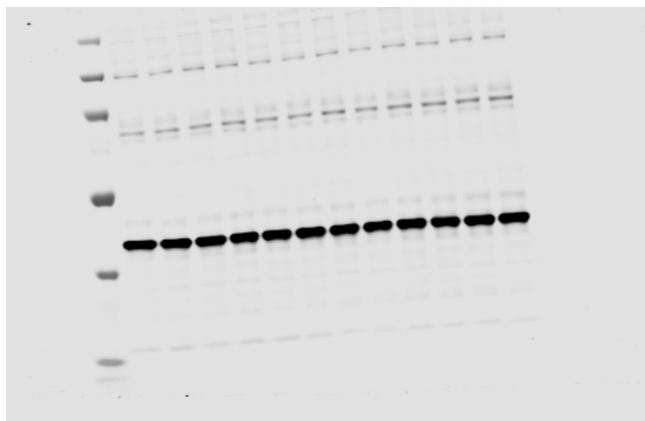

Full Unedited Gel for Figure 6

GAPDH\_Phospho Blot; Replicate 2

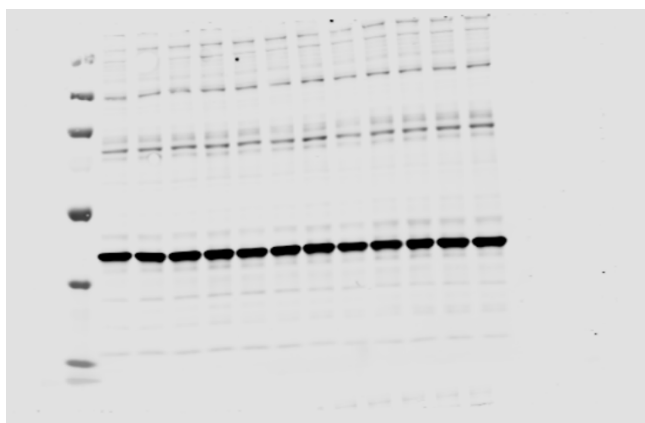

Full Unedited Gel for Figure 6

GAPDH\_Total Blot; Replicate 2

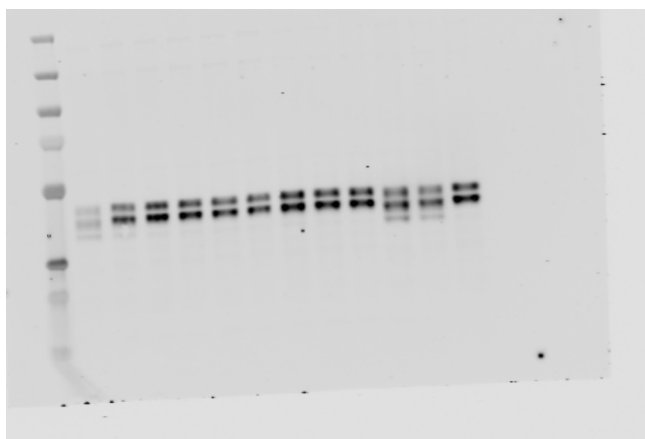

Full Unedited Gel for Figure 6

Phospho ERK; Replicate 3

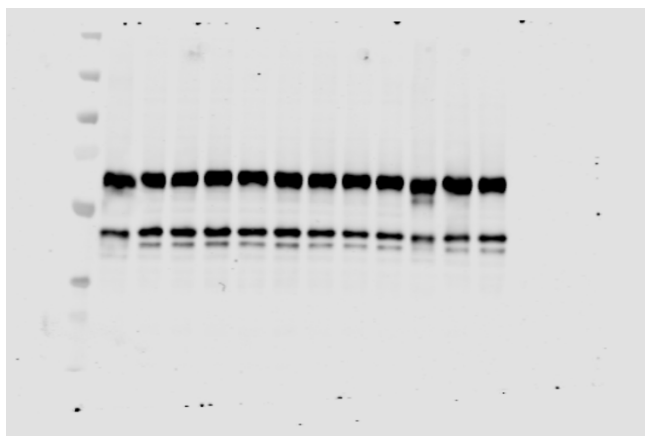

Full Unedited Gel for Figure 6

Total ERK; Replicate 3

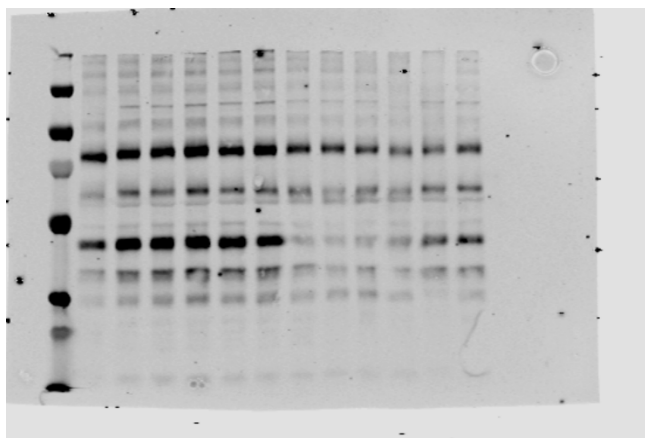

Full Unedited Gel for Figure 6

Phospho AKT; Replicate 3



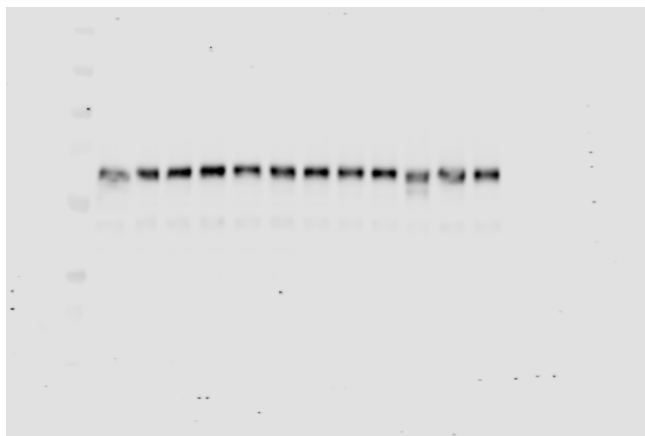

Full Unedited Gel for Figure 6

Total AKT; Replicate 3

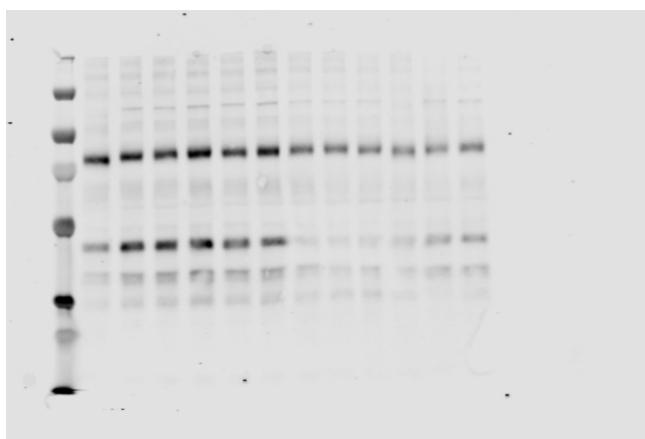

Full Unedited Gel for Figure 6

Phospho CREB; Replicate 3

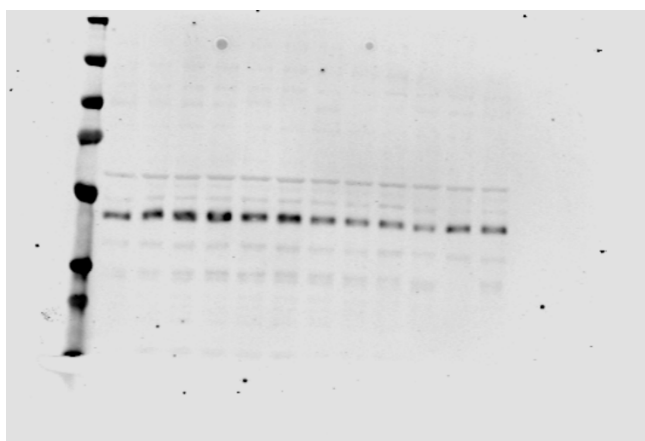

Full Unedited Gel for Figure 6

Total CREB; Replicate 3

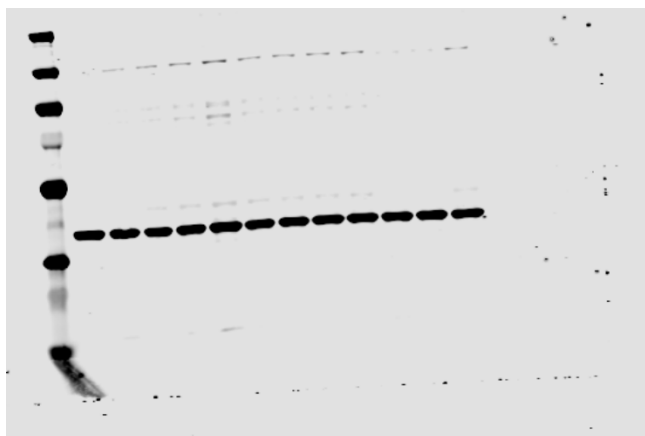

Full Unedited Gel for Figure 6

GAPDH\_Phospho Blot; Replicate 3

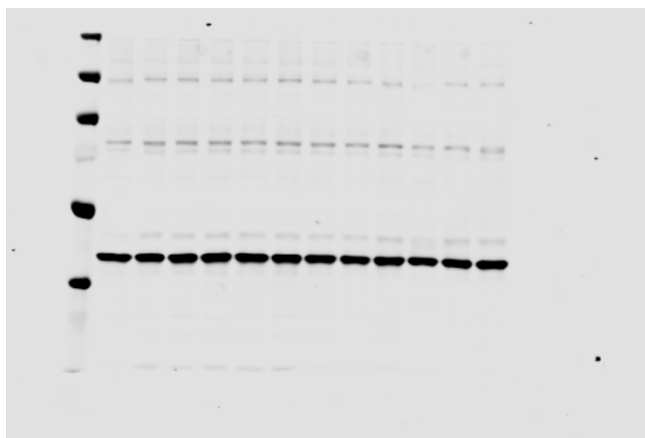

Full Unedited Gel for Figure 6

GAPDH\_Total Blot; Replicate 3
